# The effect of a canine semen activator supplementation or addiction on the long-term refrigeration quality of dog spermatozoa

MARTÍNEZ-BARBITTA, Marcelo<sup>1-2\*</sup>; RIVERA SALINAS, Claudio<sup>3</sup>;

<sup>1</sup> Doctoral Student of the Faculty of Veterinary Medicine - University of Republic (Uruguay)/University of Perugia (Italy). Alberto Lasplaces 1620 – 11600 - Montevideo – Uruguay/ Via San Costanzo 4 – 06126 – Perugia PG

<sup>2</sup> Reproductive Veterinary Service\_Uruguay® - Luis Alberto de Herrera 1154 - Nueva Helvecia - 70201 - Uruguay. srvi.uy@gmail.com

<sup>3</sup> Clone® Chile – Reproductive Asistence Clinic - Av. Acueducto 2992 - Peñalolén – Santiago de Chile - Chile.

[crivera@clonechile.com](mailto:crivera@clonechile.com)

\* Corresponding author

## ABSTRACT

Within modern biotechnology, different tools have been developed to maximize canine semen conservation protocol to optimizing reproductive results and making their handling more flexible. In the last decades, the survival of refrigerated semen has been prolonged from 2-3d with the first basic diluents, to 10-14d using the most modern extenders. However, their main limitation is that sperm quality decreases during cold storage. Semen activators (SA) have been produced to provide the molecules necessary to maximize the sperm survival and quality with the aim to enhance fertility and prolificacy. In this study, the effect of SA was recorded by daily evaluation of chilled semen 14d. For this experiment, six adult healthy Neapolitan Mastiff dogs, were used as donors and the semen was manually collected. Spermatozoa-rich fractions of each subject was chilled using a new generation extender for long periods of time (d0) starting from the d1 to d14, different aliquot, with (experimental trial) and without SA (control trial), were evaluated daily for motility vigor, morphology and membrane integrity. The initial sperm concentration of extended semen was  $417.3 \pm 170.4 \times 10^6/\text{mL}$  (mean  $\pm$  SEM) with  $85.89 \pm 4.76\%$  of MNS (morphologically normal sperm),  $84.47 \pm 5.22\%$  vital sperm and a pH of  $6.2 \pm 2.8$ . The initial vigor was  $3.83 \pm 0.48$ , but after one min with SA, it rose to  $4.45 \pm 0.45$  ( $P < 0.001$ ). The semen motility parameter increase significantly ( $P < 0.05$ ) in experimental trial, respect to control, starting to d2 at finish (except for d7). The vigor analysis significantly increase in experimental trial ( $P < 0.05$ ) during the most day of the study with the exclusion of d3 and d14. For evaluate the semen characteristics over time, the experiment was divided into T1 (d0-d5), T2 (d6-

35 d10) and T3 (d11-d14) ( $P < 0.001$ ) in evaluation of morphology and membrane stability.  
36 The MNS reached 70% at d10 and finally 65% at d14, being considered normal and  
37 possibly fertile. With Host-s, 65% of MNS were also achieved at d14. The presence of  
38 glucose and fructose in the diluents used for refrigeration can exert very important  
39 effects given the fact that metabolic routes have been found in both sugars, providing  
40 both different and complementing effects. It can be concluded that the use of SA prior  
41 to artificial insemination improves the quality of chilled semen significantly, although it  
42 does not reverse the effects of deterioration due to cellular metabolism over time.

43

#### 44 **KEY WORDS**

45 **Canine**

46 **Assisted reproductive technology**

47 **Sperm cryopreservation**

48 **Chilled semen**

49 **Semen activator extender (SA)**

50 **Sugar**

51

#### 52 **1- INTRODUCTION**

53 Despite of the artificial insemination in dogs is documented, for the first time, by  
54 Lazzaro Spallanzani in 1788, only in the last decades its use in companion animals  
55 reproduction has been more widely performed. In fact canine pure dog breeders  
56 increasingly require the use of this technique using fresh, chilled or frozen semen. The  
57 use of fresh sperm is indicated in male or female that cannot the natural mating for  
58 physical or behavioural causes. The storage of sperm (chilled or frozen) allows a  
59 wider genetic improvement of breed advantage of chilled respect to fresh semen are  
60 cost relatively inexpensive between countries, animal transportation, and less  
61 stressing life-threatening and time-consuming reduces venereal disease risks and  
62 allows breeders to use semen from genetically superior dogs, simplify and popularize  
63 insemination techniques [1-2].

64

65 During the storage process of semen, for limited the damages caused by drop  
66 temperature, and to provide energy, maintain pH and osmolarity, reduce oxidation,

67 preserve plasma, acrosomal and mitochondrial membrane integrity, etc., an appropriate  
68 diluent must be used (extender) with sperm [3-7].

69

70 Storage of refrigerated semen at 4-8 °C induces a transition in the sperm plasma  
71 membrane from the cooled crystalline to the gel phase. At body temperature, the  
72 metabolism of the sperm is maximum, while at room temperature (24-29 °C), it  
73 decreases. For every 10 °C decrease, cellular metabolism is reduced by 50%; at 5 °C  
74 metabolic activity of sperm is only 10% of what it would be at body temperature [8].

75

76 More recently, use of supplementation of activators of insemination (SA) whose basic  
77 composition is formulated by easily metabolized carbohydrates that provide the  
78 mitochondria of the spermatid neck with a fast energy substrate to maximize their  
79 metabolism at the time of insemination has been studied by several authors [9-12] and  
80 enhances seminal motility in order to maximize fertility and prolificacy of semen.

81

82 Therefore, use of long-term refrigeration seminal diluents together with activators  
83 when using the germplasm, would enhance the management of these biotechnologies  
84 by the reproductive male, allowing the female to be managed more effectively,  
85 maximizing reproductive results [11-14]. Therefore, the objective of this experiment  
86 was to evaluate the motility and survival of the spermatozoa under a dilution protocol  
87 with refrigeration for 14 days, corroborating the effect of SA during the whole process.

88

## 89 **2- MATERIALS AND METHODS**

90

### 91 **2.1 Animals and location**

92 The work was carried out in the month of December, at the facilities of the laboratory  
93 and semen bank of Clone® Chile (Santiago de Chile).

94

95 The experiment was carried out according to the bioethics and animal experimentation  
96 standards of the participating countries and has been evaluated by the corresponding  
97 committees.

98

99 Six Napolitan Mastiff male dog with an average weight and age of  $88 \pm 12$  kg (MED  $\pm$   
100 SEM) and  $30.5 \pm 3.5$  months respectively were used. The dogs were confirmed healthy  
101 based on history, clinical examination including full andrological evaluation and  
102 ultrasound examination of the prostate and testis. Dogs were fed twice daily (at 8.00  
103 AM and 10.00 PM) using commercial dry food and selected chicken prey. Fresh water  
104 was available ad libitum.

105

## 106 **2.2 Semen collection and evaluation**

107 Semen was manually collected as described previously [15] in the same day around  
108 8:00 PM and promptly examined the characteristic of seminal fluids, under a laminar  
109 flow chamber (Biobase<sup>®</sup> BBS-H1500, Chile). In particular the volume of the sperm rich  
110 fraction was determined, the pH of the seminal and prostatic fraction was assessed by  
111 pHmetro (Hanna Instrument<sup>®</sup> HI 5521, Chile), sperm morphology and vitality were  
112 assessed by eosin-nigrosine staining (Minitüb<sup>®</sup>, Tiefenbach, Germany) smears  
113 counting at least 200 spermatozoa per slide, and total sperm concentration was  
114 obtained by photometer (SDM 1 Photometer, Minitüb<sup>®</sup>, Tiefenbach, Germany, Series  
115 1260162485, calibrated for canines) in accordance with the manufacture  
116 recommendations.

117

118 Moreover in the sperm rich fraction, the evaluation was performed, with two aliquots  
119 of 30  $\mu$ L on slides, covered with coverslips, all pre-tempered at 37 °C with thermal  
120 stage (HTM-MiniTherm, Hamilton<sup>®</sup> Thorne Biosciences - Beverly, MA, USA), for  
121 visualization using a phase contrast microscope (Olympus<sup>®</sup> BH-2 - Japan) X 100,  
122 waiting 60 s for observation, to determine motility (%) and vigor according to the scale  
123 described by Howard et al. (1990) [16]. The evaluation was repeated at five, 10 and  
124 15 min.

125

126 Within the first minute of collection to a second aliquot of semen 30  $\mu$ L was added 30  
127  $\mu$ L of SA extender (TherioSolutions<sup>®</sup> Canine AI extender – Chile -SA-), homogenized  
128 and waited 60 s to reassess motility and vigor, as described above. The evaluation  
129 was also repeated at five, 10 and 15 min.

130

131 From the first day and daily since, the structural and vital characteristics of the semen  
132 samples were evaluated after tempering for 60 s by the vital morphology stains of  
133 Farelly (Minitüb®, Tiefenbach, Germany), using the method described by Oettlé (1986)  
134 [17] X 1000 with immersion oil.

135  
136 Sperm vitality due to membrane stability, counting at least 200 sperm cell per sample,  
137 was performed using the Hyposmolarity Test (Simplified Host –Host-s-), according to  
138 the method of Sánchez & Garrido (2013) [18].

139  
140 In both fresh and refrigerated semen, sperm with a functional membrane were  
141 considered, which reacted to hypo-osmotic stress by dilating the distal part of the  
142 spermatic tail or curling it. While those sperm without changes in the tail were  
143 considered functionally damaged, and the results were expressed as a percentage of  
144 sperm with a functional membrane (sperm with abnormalities in the tail, by Farelly,  
145 were excluded from the count).

146  
147 The individual semen samples were refrigerated at 4 °C (Bozzo® Refrigerator SD-350,  
148 Chile, with a maximum and minimum thermometer inside) and evaluated in relation to  
149 their vigor and motility every 24 hours for 14 days (TherioSolutions® Canine Chilling  
150 extender, Chile). The alcohol in the external tube prevented cold shock during the  
151 chilling process and temperature variations over study period [19].

152

### 153 **2.3 Statistical Analysis**

154 The mean and SEM of spermatozoa vigor, motility, structural morphology and  
155 permeability membrane were measured by using descriptive statistics. The data were  
156 analyzed by ANOVA and T-test using SPSS® 21.0 software (SPSS Inc., Chicago, IL,  
157 USA) [20]. The difference between values was considered significant when the P value  
158 was less than 0.05.

159

## 160 **3- RESULT**

161

### 162 **3.1 General Characteristics**

163 The collection of the spermatozoa of the animals showed a good seminal quality  
164 determined for a race of giant individuals during the summer season. The volume of  
165 the second fraction of the ejaculate was  $3.9 \pm 1.6$  mL with a pH of  $6.2 \pm 2.8$ . The  
166 prostatic fraction maintained the same value and dispersion in pH. The sperm  
167 concentration was  $417.3 \pm 170.4$  million sperm per mL. The initial evaluation of the  
168 semen by eosin-nigrosin staining resulted in  $85.89 \pm 4.76$  with no head staining,  
169 considering them to be alive.

170

### 171 **3.2 Analysis of Seminal Vigor**

172 The initial vigor was  $3.83 \pm 0.48$ . After 1 min of AS, the vigor was  $4.45 \pm 0.45$  (P  
173  $<0.001$ ). Graph N°1 shows the variation in the time of the refrigerated seminal vigor  
174 after being adjusted at 37 °C with and without the addition of AS.

175

176 From d1 to d13 they showed significant differences, with the exception of d3 (P  
177  $<0.065$ ).

178

### 179 **3.3 Seminal Motility**

180 The initial seminal motility was  $85.83 \pm 5.23\%$ . After one minute of AS, motility  
181 increased to  $89.92 \pm 5.18\%$  (P  $<0.05$ ). Graph N°2 shows the variability of seminal  
182 motility with and without AS during the days of refrigeration of the semen. At all  
183 moments evaluated, with the exception of d1 and d7, significant differences were  
184 found between the samples.

185

186 In Graph N° 3 the variability of the average seminal vigor and motility of the entire  
187 period is observed, based on the differences according to the waiting of the evaluation,  
188 after the temperament of the sample refrigerated at 37 °C.

189

### 190 **3.4 Spermatic Morphology**

191

192 Regarding morphology,  $84.47 \pm 5.22\%$  of MNS (morphologically normal sperm),  $3.96$   
193  $\pm 1.95$  with head defects, and  $7.20 \pm 3.01$  of defective intermediate piece were found  
194 with vital staining and finally  $4.37 \pm 0.61\%$  of tail defects at the beginning of the  
195 experiment. In Graph N° 4 that observes the evolution of the defects and their  
196 distribution in the spermatozoa during refrigeration.

197

198 After 14 days of decrease, with a practically linear decrease, a 19.47% lower value  
 199 was found, with an average reduction of 1.5%/day, according to the Farelly staining  
 200 analysis method. It should be noted that distinguishing between the affected area, tail  
 201 changes increase by 49%, while in the intermediate part they increase by 122% and  
 202 finally, problems in the sperm head grow by 216% (P <0.001).

203

204 According to the waiting period of the evaluation of the motility and vigor of the semen  
 205 samples, after the placement of the SA, there were very important changes. At one  
 206 minute of placing the SA, the average vigor during the 14 days was  $2.43 \pm 0.65$ , and  
 207 at 15 minutes it increased to  $3.23 \pm 0.86$  (P <0.01), being 32.8 % higher. For motility,  
 208 the variation was less but still substantially equal (P <0.05), while the average  
 209 evaluation of the period one minute after adding the SA was  $48.45 \pm 12.9\%$ , at 15  
 210 minutes it was  $56, 55 \pm 15.11\%$ , an increase of 16.7% at the end of the term.

211

### 212 **3.5 Membrane Integrity**

213 Regarding the stability of the membrane, at d0  $85.89 \pm 4.76\%$  of spermatozoa were  
 214 found to be normal, subtracting  $14.11 \pm 4.76\%$  of those with permeability integrity  
 215 defects. In the Graph N° 5 shows the variability of sperm membrane stability.

216

217 To analyze the changes in membrane stability and sperm morphology, the times were  
 218 divided into three periods, according to the viability of the seminal extensors that are  
 219 normally divided into short, medium and long-term. Thus, T1 (short term) is used for  
 220 the period between d0 and d5, T2 (medium term) for the period between d6 and d10  
 221 and finally T3 (long term) between d11 and d14. In the worksheet N° 1 are the  
 222 variations relative to the changes in seminal morphology and membrane stability.

223

|                                       | <b>T1 (%)</b>      | <b>CV (%)</b> | <b>T2 (%)</b>      | <b>CV (%)</b> | <b>T3 (%)</b>      | <b>CV (%)</b> |
|---------------------------------------|--------------------|---------------|--------------------|---------------|--------------------|---------------|
| <b>Normal Morphology<sup>1</sup></b>  | $81,97 \pm 0,89^a$ | 2,67          | $72,62 \pm 1,06^b$ | 3,28          | $67,62 \pm 0,94^c$ | 2,78          |
| <b>Membrane Stability<sup>2</sup></b> | $85,43 \pm 0,13^d$ | 0,38          | $79,71 \pm 1,45^e$ | 4,06          | $69,40 \pm 1,81^f$ | 5,22          |

224 Table N° 1 - Comparison between sperm morphology and membrane stability test with  
 225 distinction of storage times by refrigeration. T1 = d0-d5; T2 = d6-d10; T3 = d11-d14.

226 <sup>1</sup> Refers to Farelly's Vital Staining subjective assessment.

227 <sup>2</sup> Corresponds to normal sperm according to Host-s.

228 Different letters in the same row p <0.001

229  
230  
231  
232  
233  
234  
235  
236  
237  
238  
239  
240  
241  
242  
243  
244  
245  
246  
247  
248  
249  
250  
251  
252  
253  
254  
255  
256  
257  
258  
259  
260  
261  
262  
263

#### 4 – DISCUSSION

The volume, concentration, live and dead sperm (eosin/nigrosin) and pH of the second phase of the ejaculate of all animals remained within normal values, therefore they were all included in the following analysis [21].

Regardless of species, all extenders used for cold storage of genetic material must provide cells with: nutrients as an energy source; a buffer against damage by changes in pH; electrolyte concentration to control physiological osmotic pressure; protection against bacterial growth and thermal shock during refrigeration and/or freezing [3-4,7]. By contrast, activators are added agents, used in both refrigerated and frozen semen (although also with fresh semen), to enhance sperm activity and mainly have the function of providing rapidly available sugars for sperm cells as well as providing a buffer against intense metabolic activity that would imply an associated decrease of seminal longevity and intrinsic fertility [22]. They can also integrate other substances with preventive or conservative activities of the product itself or beneficial ones associated with semen handling (for example, antibiotics). The objective of semen storage using chilling procedure is to preserve gametes at low temperatures, without reaching the freezing point, which induces deleterious intracellular changes that affect viability and fertilizing potency of spermatozoa [15,22]. This technique of chilling preservation is a promising alternative to conventional semen cryopreservation, and is easily adapted for clinical use. It is particularly useful for the shipment of semen where the cost of procedures and materials are high [23]. This technique would also be of major importance if it extended the fertilizing potential of spermatozoa for more than a few days (ideally between 10-14 d). Thus semen could be collected a few days after the detection of pro-estrus in bitch and then processed, transported and stored at the location of its intended use.

The commercial formulations of the laboratories reveal known components, but also have components that are not disclosed in the formulas made by the manufacturers. TherioSolution® declares that it possesses glucose extender in SA extender and chilling products and also fructose in the chilling formula. Most of the extensors reported for use in cryopreservation of domestic canine sperm contain either glucose, lactose or fructose [15,19,23-32]. Furthermore, fructose has been used intensively in



264 extenders for wild dogs such as foxes [24-27,33]. Sugars have long been included in  
265 semen diluents as exogenous energy substrates, as osmotic components, and as  
266 cryoprotective agents [34]. Sperm can glycolyze glucose, fructose and mannose [35]  
267 and oxidize arabinose [36]. However, the higher molecular weight of sugars such as  
268 lactose, sucrose and raffinose have low permeability, and are generally considered  
269 only as a cryoprotective agent [37] and not as an energy source. In dog semen, due  
270 to the absence of seminal vesicles, fructose is found in a very low concentration  
271 compared to that of other species [30,38]. However, canine sperm appear to be able  
272 to use fructose in a similar way to sperm from species with high fructose content in  
273 their accessory gland secretion. Still, it is important to notice that in 2001 Iguer-ouada  
274 & Verstegen found better results using glucose versus fructose as the energy  
275 substrate, possibly indicating a preference of dog sperm to metabolize this molecule  
276 instead of fructose [23].

277

278 Ponglowhapan, et al (2004) [30] investigated the importance of the source and  
279 concentration of the type of energy source molecule in sperm metabolism during  
280 refrigeration in canines and found that lactose is more efficient than glucose in  
281 obtaining energy levels higher (ATP measurement enzymatically) in fresh sperm.  
282 Furthermore, there are indications that fructose may possibly play a role as a sperm  
283 activator after ejaculation [39]. Yildiz, et al. (2000) [40] suggest that sugars allow the  
284 maintenance of osmotic pressure and perform a cryoprotective action. Based on this,  
285 is expected that the inclusion of sugars in the extenders could serve as the  
286 preservation of the spermatic motility, maintenance of the viability, and integrity of the  
287 acrosome and the spermatic membrane [40-41].

288

289 During our evaluation, in 14 d, either the partial results of the use of chilling extender  
290 using motility and vigor as indicators of vitality and Host-s as a test of plasma  
291 membrane stability, showed very promising results. And at almost all times, the  
292 addition of the SA extender improved the quality of the evaluated sperm, proving that  
293 this SA extender could be added at any time to stimulate quality and improve  
294 reproductive results. In the 14 days of evaluation, the MNS barely reached 70 % at  
295 d10, reaching 65% at d14. These were able to be considered normal values that would  
296 not affect the fertility achieved with said semen [21].

297

298 A high variability was found between the motility and vigor values achieved according  
299 to the evaluation time after the placement of the SA (Graph N°3). From one to 15  
300 minutes, the values always increased and had significant variations, which could be  
301 explained by the absorption of the seminal plasma membrane of the activator extender  
302 components over time, which takes some time and increases the metabolic activity of  
303 the sperm cell. It also establishes the importance of waiting time between the addition  
304 of the activator and the evaluation of the sample. This proves the necessity to be strict  
305 with the time frame of the evaluation and the methodology of the applied experimental  
306 design.

307

308 The use of Host-s, for hypo-osmotic stress or membrane stability, has been validated  
309 in dogs for both fresh and refrigerated semen [18], in which the capacity of the  
310 membrane of the sperm cells to allow the flow of ions and of water into the cell is  
311 measured [42]. Our results showed a stability up to d5 of 85%, then it decreased  
312 almost linearly until d14 reaching 65%, decreasing approximately 2% per day. It was  
313 very interesting that after two weeks, two out of three sperm evaluated, remained with  
314 a viable plasma membrane. Previous studies [43] had already shown that the addition  
315 of sugars significantly differentiated the response of sperm against hypo-osmotic tests  
316 in control samples in the absence of sugars. Reported that the motility of sperm cells  
317 had a higher significant value with the use of refrigeration media with  
318 monosaccharides (glucose and fructose), compared to disaccharides (trehalose and  
319 sucrose). This could be explained by their greater availability, either as an energetic  
320 medium for the spermatid neck mitochondria as well as their cryopreservative function.

321

322 The results could be explained because during semen refrigeration, the main function  
323 of sugars is to provide the energy substrate required by sperm for the normal  
324 performance of their functions, glucose being one of the sugars best used by the  
325 sperm cell [41]. Fernández-Novell et al. (2004) [44] observed in dog sperm that  
326 glucose, but not fructose, can specifically activate the protein kinase AKT, involved in  
327 the regulation of several important cellular metabolic processes. This would imply that  
328 glucose would directly activate all AKT-regulated pathways of sperm. It can be  
329 assumed that, in the case of the canine, sugars can act not only as proper substrates  
330 of metabolism, but also as direct modulators of spermatid function. The effects of these

331 two sugars on the metabolism of freshly ejaculated sperm have been studied in dogs,  
332 and there is evidence that dog sperm metabolizes glucose and fructose using separate  
333 pathways [41]. This results in differentiated management systems of energy as  
334 indicated by their different roles in glycogen metabolism [45], motility patterns [39],  
335 hexose metabolism [41], and glycogen deposition [46].

336 Fructose, with respect to glucose, showed an increase in speed in the metabolic  
337 pathways and, therefore, in the formation of ATP. Fructose, by increasing the motility-  
338 related consumption rate of ATP, results in a faster and more linear specific pattern  
339 than that observed with glucose [39], dedicating most of the energy consumption of  
340 the sperm to maintaining motility. The effect of fructose on motility, would be related  
341 to a strong increase in the phosphorylation index of hexoses with respect to glucose.  
342 This increase, in addition to the consumption of ATP in the tyrosine phosphorylation,  
343 could lead to the establishment of the substrate that completes the cycle in which the  
344 energy that is immediately lost is generated. A drop in intracellular ATP levels would  
345 logically induce an immediate increase in ADP, which in turn would activate the  
346 glycolytic rhythm and increase ATP formation. When ATP returns to high levels, there  
347 would be a simultaneous drop in ADP levels, with a consequent decrease in glycolytic  
348 rhythm [47].

349 This feedback phenomenon would cause a high consumption rate and possible  
350 depletion of the fructose provided in the diluent, which indicates the importance of  
351 choosing the appropriate type and concentration of sugar, since small variations could  
352 cause large changes in the functional state, and therefore, the capacity of survival of  
353 sperm stored in refrigeration. Hence, the proposal analyzed by technicians and  
354 researchers to renew refrigeration diluents to maintain the metabolic activity of sperm  
355 and delay their death. In turn, the presence of both monosaccharides (glucose and  
356 fructose) is also highlighted in the extender for chilling used, where each  
357 monosaccharide would act differently on seminal cell metabolism, but only glucose in  
358 the SA extender.

359 Mammalian sperm require exogenous substrates for a variety of functions. For  
360 example, to preserve intracellular energy stores, cellular components, and most  
361 importantly, to support motility [48]. They can obtain energy through mitochondrial  
362 oxidative phosphorylation and glycolysis, by consuming glycolizable sugars, such as

363 glucose, fructose, mannose, and maltose [49]. Fructose is believed to be an important  
364 source of energy for ejaculated sperm [50], and along with glucose it is found in  
365 seminal plasma in many mammalian species.

366

367 The results of the present study clearly demonstrated that the main effect of glucose  
368 and fructose on cold semen extenders in canine semen are to provide inputs that  
369 intervene in sperm motility and movement patterns. Motility is an important indicator  
370 of the use of sugar by sperm since they provide the essential external energy source  
371 to maintain motility. This is the practical criteria for evaluating semen quality on a  
372 commercial level, being widely associated with fertility [15].

373

374 There are not many studies that have published variations in seminal quality after  
375 prolonged periods [23,30]. Also, none that have used SA in each period to assess the  
376 reaction of sperm to the addition of products that enhance their activity, finding more  
377 than important and significant reactions throughout the evaluation period, which could  
378 improve the viability of the cells and their mobility, which would ultimately affect the  
379 fertility and prolificacy obtained [49].

380

381 During d1, although there were apparently no modifications in the plasma membrane  
382 evaluated by Host-s, the morphological abnormalities increased significantly between  
383 5-6%. Within these, especially those associated with problems in the sperm head (the  
384 abnormalities found were doubled from 4 to 8%, being highly significant), motility  
385 decreased by 25% (highly significant) and vigor decreased by one point. These  
386 findings are consistent with that published by Ponglowhapan et al. (2004) [30], where  
387 these researchers found that in those first five days, the consumption of carbohydrates  
388 by the sperm cells was greater than a posteriori, which would indicate a deceleration  
389 of the metabolic rate of the sperm that could compromise the subsequent preservation  
390 and cell survival. Although possible changes in the capacitation and reactions of the  
391 sperm acrosome were not evaluated in the present work, several publications  
392 [26,31,51-53] reveal that the significance of these harmful effects in the seminal cell,  
393 which transcend cell death and lower fertility, are frequent in the freezing/thawing  
394 process, but not as pronounced in keeping the semen above freezing point.

395

396 In this work, we found that the highest values of motility and vigor were obtained  
397 between 10 and 15 minutes after the activator was placed in the semen, when related  
398 to the evaluation at the moment of placing the SA, which would demonstrate the rapid  
399 availability of carbohydrates for cellular metabolism and the use of the latter by seminal  
400 cells.

401

402 No matter how much diluent is used to protect the sperm, heat shock will cause  
403 significant cell death. In our study, without the inclusion of the activator, there was a  
404 decrease of 32.91% in motility and 41.45% in vigor, initially, between d0 and d1,  
405 without the application of SA, data in the sense of previous research [23,30].

406

## 407 **5- CONCLUSIONS**

408

409 Refrigeration of semen for long periods, obtaining quality semen, allows the sending  
410 of samples over long distances, avoiding the mobilization of breeders with the  
411 associated stress, transportation costs and potential health risks of mobility. The  
412 simplicity of the technique allows its mass use at a commercial level. The use of SA  
413 extender enhancers significantly improves the quality parameters at any time, after  
414 tempering the refrigerated sample, which would improve the fertility and prolificacy  
415 results of the obtained litters. These latter estimates require further studies to be  
416 verified.

417

418 The results obtained open the expectation to new working modalities with extenders  
419 for chilling that allow the use of breeding animals of high genetic value to be  
420 generalized, without the need to freeze the semen (with the dramatic changes that  
421 freezing/thawing cause in the seminal cell), with the complexities of transportation, and  
422 costs and handling that they require to obtain satisfactory results.

423

424 This research did not receive any specific grant from funding agencies in the public,  
425 commercial, or not-for-profit sectors.

## 426 **6- CREDIT AUTHOR STATEMENT**

427

428 Martínez Barbita: Project administration, Conceptualization, Investigation, Software,  
429 Data curation, Validation, Writing- Reviewing and Editing. Rivera Salinas: Financial  
430 support, Methodology and Writing- Original draft preparation.

## 431 7- ACKNOWLEDGMENT

432  
433 The authors thank the team of Dr.VM Héctor Pérez from SVSL Puerto Rico for their  
434 collaboration in the translation of the article.

## 435 8- REFERENCES

436

437 [1] Michael AJ, Alexopoulos C, Pontiki EA, Hadjipavlou-Litina DJ, Saratsis P, Ververidis  
438 HN; Boscos CM. Effect of N-acetyl-L-cysteine Supplementation in Semen Extenders on  
439 Semen Quality and Reactive Oxygen Species of Chilled Canine Spermatozoa. *Reprod*  
440 *Dom Anim* 2010; 45: 201-207.

441 [2] Nguyen V, Ponchunchoovong S, Kupittayanant S, Kupittayanant P. Effects of egg yolk  
442 and soybean lecithin on sperm quality determined by computer-assisted sperm analysis  
443 and confocal laser scanning microscope in chilled canine sperm. *Vet Med Sci* 2019: 1-16.

444 [3] Mazur, P. The role of cell membranes in the freezing of yeast and other single cells.  
445 *Ann. New York Acad. Sci.* 1965; 125: 658-676.

446 [4] England GCW. Cryopreservation of dog semen: a review. *J Reprod Fertil* 1993  
447 (Suppl.); 47: 243-255.

448 [5] England GCW, Ponzio P. Comparison of the quality of frozen-thawed and cooled-  
449 rewarmed dog semen. *Theriogenology* 1996; 46: 165-171.

450 [6] Rota A, Ström B, Linde-Forsberg C. Effects of seminal plasma and three extenders on  
451 canine semen stored at 4°C. *Theriogenology* 1995; 44: 885-900.

452 [7] Tsutsui T, Hase M, Hori T, Ito T, Kawakami E. Effects of orvus ES paste on canine  
453 spermatozoal longevity after freezing and thawing. *J Vet Med Sci* 2000; 62: 533-535.

454 [8] McKinnon AO. Breeding and its technology - now and the future.  
455 [www.harness.org.au/99wldcon/CONFEREN](http://www.harness.org.au/99wldcon/CONFEREN).HTML; 1999 [accessed 22 December 2019].

456 [9] Neild DM, Brouwers JFH, Colenbrander B, Ero A, Gadella BM. Lipid peroxide formation  
457 in relation to membrane stability of fresh and frozen thawed stallion spermatozoa. *Mol*  
458 *Reprod Dev* 2005; 72: 230-238.

459 [10] Ball BA. Oxidative stress, osmotic stress and apoptosis: Impacts on sperm function  
460 and preservation in the horse. *Anim Reprod Sci* 2008; 107: 257-267.

- 461 [11] Pojprasath T, Lohachit C, Techakumphu M, Stout T, Tharasanit T. Improved  
462 cryopreservability of stallion sperm using a sorbitol-based freezing extender.  
463 Theriogenology 2011; 75: 1742-1449.
- 464 [12] Bozkurt T, Türk G, Gür S. The time-dependent motility and longevity of stallion  
465 spermatozoa diluted in different spermatozoal concentrations and extenders during cool-  
466 storage. Revue Med Vet 2007; 158: 67-72.
- 467 [13] Aboagla EM, Terada T. Effects of supplementation of trehalose extender containing  
468 egg yolk with sodium dodecyl sulfate on the freezability of goat spermatozoa.  
469 Theriogenology 2004; 62: 809-818.
- 470 [14] Silva AR, Cardoso RCS, Silva LDM. Comparison between different dilution rates on  
471 canine semen freezing using tris-buffer with the addition of egg-yolk and glycerol. Arq Bras  
472 Med Vet Zootec 2005; 57: 764-771.
- 473 [15] Linde-Forsberg C. Achieving canine pregnancy by using frozen or chilled extended  
474 semen. Vet Clin North Am Small Anim Pract 1991; 21: 467-485.
- 475 [16] Howard JG, Brown JL, Bush M, Wildt DE. Teratospermic and normospennic domestic  
476 cats: Ej aculate traits, pituitary-gonadal hormones and improvement of spermatozoa  
477 motility and morphology der swim-up processing. J Androl 1990; 11: 204-215.
- 478 [17] Oettlé EE. Changes in acrosome morphology during cooling and freezing of dog  
479 semen. Am Reprod Sci 1986; 12: 145-150.
- 480 [18] Sánchez A, Garrido D. Evaluación de una prueba hipoosmótica simplificada en  
481 semen canino fresco y refrigerado. 2013; FCV-LUZ 6: 506-510.
- 482 [19] Linde-Forsberg C, Forsberg M. Results of 527 controlled artificial inseminations in  
483 dogs. J Reprod Fertil Suppl 1993; 47: 313-23.
- 484 [20] Heath D. An introduction to experimental design and statistics for biology. UCL Press,  
485 London, UK, 2000.
- 486 [21] Root Kustritz MV. The value of canine semen evaluation for practitioners.  
487 Theriogenology 2007; 68: 329-337.
- 488 [22] Smith FO, Graham EF. Cryopreservation of canine semen: Techniques and  
489 performance. Proceedings of the 10th International Congress on Animal Reproduction and  
490 Artificial Insemination, University of Illinois, Urbana-Champaign, Jun 10-14, 1984; 2: 2-16.
- 491 [23] Iguer-ouada M, Verstegen JP. Long-term preservation of chilled canine semen: effect  
492 of commercial and laboratory prepared extenders. Theriogenology 2001; 55: 671-684.
- 493 [24] Gill HP, Kaufman CF, Foote RH, Dirk RW. Artificial insemination of beagle bitches  
494 with freshly collected, liquid-stored and frozen-stored semen. Am J Vet Res 1970; 31:  
495 1807-13.
- 496 [25] Fontbonne A, Badinand F. Canine artificial insemination with frozen semen:  
497 comparison of intravaginal and intrauterine deposition of semen. J Reprod Fertil Suppl  
498 1992; 47: 325-327.

- 499 [26] Rodriguez-Martinez H, Ekwall H, Linde-Forsberg C. Fine structure and elemental  
500 composition of fresh and frozen dog spermatozoa. *J Reprod Fertil Suppl* 1993; 47: 279-  
501 285.
- 502 [27] Nöthling JO, Gerstenberg C, Volkmann DH. Success with intravaginal insemination  
503 of frozen-thawed dog semen—a retrospective study. *J S Afr Vet Assoc* 1995; 66(2): 49-55.
- 504 [28] Silva LD, Onclin K, Lejeune B, Versteegen JP. Comparisons of intravaginal and  
505 intrauterine insemination of bitches with fresh or frozen semen. *Vet Rec* 1996; 138: 154-  
506 157.
- 507 [29] Hay MA, King WA, Gartley CJ, Leibo SP, Goodrowe KL. Effects of cooling, freezing  
508 and glycerol on penetration of oocytes by spermatozoa in dogs. *J Reprod Fertil Suppl*  
509 1997; 51: 99-108.
- 510 [30] Ponglowhapan S, Essén-Gustavsson B, Linde Forsberg C. Influence of glucose and  
511 fructose in the extender during long-term storage of chilled canine semen. *Theriogenology*  
512 2004; 62: 1498–1517.
- 513 [31] Yang M, Wang B, Liu J, Li Y, He SH, Kuang H, Li Y, Peng J. Investigation of various  
514 cryopreservation methods for improvement of canine sperm survival. *Refu Vet* 2018; 73  
515 (2): 24-32.
- 516 [32] Puja IK, Sawitri NM, Maharani N, Heryani LGSS, Dharmayudha AAGO, Gunawan  
517 IWNF. Preservation of semen from Kintamani Bali dogs by freezing method. *J Adv Vet*  
518 *Anim Res* 2019; 6 (2): 158-62.
- 519 [33] Farstad W, Andersen-Berg K. Factors influencing the success rate of artificial  
520 insemination with frozen semen in the dog. *J Reprod Fertil Suppl* 1989; 39: 289-92.
- 521 [34] Watson PF. The preservation of semen in mammals. *Oxf Rev Reprod Biol* 1979; 1:  
522 283-350.
- 523 [35] Mann T. The biochemistry of semen and of the male reproductive tract. Methuen,  
524 Press London; 1980.
- 525 [36] White IG, Blackshaw AW, Emmens CW. Metabolic and motility studies relating to low  
526 temperature storage of ram and bull spermatozoa. *Aust Vet J* 1954; 30: 85-94.
- 527 [37] England GWC. The cryopreservation of dog semen. University of London, 1992. PhD  
528 Thesis.
- 529 [38] Bartlett DJ. Studies on dog semen II. Biochemical characteristics. *J Reprod Fertil*  
530 1962; 3: 190-205.
- 531 [39] Rigau T, Farré M, Ballester J, Mogas T, Peña A, Rodríguez-Gil JE. Effects of glucose  
532 and fructose on motility patterns of dog spermatozoa from fresh ejaculates.  
533 *Theriogenology* 2001; 56: 801-815.
- 534 [40] Yildiz C, Kaya A, Aksoy M, Tekeli T. Influence of sugar supplementation of the  
535 extender on motility, viability and acrosomal integrity of dog spermatozoa during freezing.  
536 *Theriogenology* 2000; 54: 549-585.



- 537 [41] Rigau T, Rivera M, Palomo MJ, Fernández-Novell JM, Mogas T, Ballester J, Peña A.  
538 Differential effects of glucose and fructose on hexose metabolism in dog spermatozoa.  
539 Reproduction 2002; 123: 579-591.
- 540 [42] Hishinuma M, Sekine J. Evaluation of membrane integrity of canine epididymal  
541 spermatozoa by short hypoosmotic swelling test with ultrapure water. J Vet Med Sci 2003;  
542 65: 817-820.
- 543 [43] Flores J, Fernández B, Huamán H, Ruiz L. Santiani A. Refrigeración de semen canino  
544 utilizando glucosa, fructosa, trehalosa o sacarosa para prolongar la supervivencia  
545 espermática Rev Inv Vet Peru 2010; 21(1): 26-34.
- 546 [44] Fernández-Novell JM, Ballester J, Medrano A, Otaegui P, Rigau T, Guinovart J,  
547 Rodríguez-Gil JE. The presence of a high-Km hexokinase activity in dog, but not in boar,  
548 sperm. FEBS Lett 2004; 570: 211-216.
- 549 [45] Ballester J, Fernández-Novell JM, Rutllant J, Garcia-Rocha M, Palomo MJ, Mogas T.  
550 Evidence for a functional glycogen metabolism in mature mammalian spermatozoa. Mol  
551 Reprod Dev 2000; 56: 207-19.
- 552 [46] Palomo MJ, Fernandez-Novell JM, Peña A, Guinovart JJ, Rigau T, Rodriguez-Gil JE.  
553 Glucose and fructose induced dog sperm glycogen synthesis shows specific changes in  
554 the location of the sperm. Mol Reprod Dev 2003; 64(3): 349-59.
- 555 [47] Hammersted RD, Lardy HA. The effects of substrate cycling on the ATP yield of sperm  
556 glycolysis. J Biol Chem 1983; 258: 8759-8768.
- 557 [48] Salisbury GW, VanDemark NL, Lodge JR. Extenders and extension of unfrozen  
558 semen. In: Salisbury GW, Editor. Physiology of reproduction and artificial insemination of  
559 cattle, 2<sup>nd</sup> Ed. San Francisco: WH Freeman and Company; 1978. p. 442-493.
- 560 [49] Salisbury GW, VanDemark NL. Principles and technique of spermatozoa  
561 preservation. In: Salisbury GW, Crampton EW, Editors. Physiology of reproduction and  
562 artificial insemination of cattle. San Francisco: WH Freeman and Company; 1961. p. 380-  
563 402.
- 564 [50] Nagai T, Yamaguchi K, Moriwaki C. Studies on the effects of sugars on washed  
565 human sperm motility. J Pharmacobiodyn 1982; 5: 564-567.
- 566 [51] Aurich C. Factors affecting the plasma membrane function of cooled-stored stallion  
567 spermatozoa. Anim Reprod Sci 2005; 89: 65-75.
- 568 [52] Perez LJ, Valcarcel A, De las Heras MA, Moses D, Baldassarre H. Evidence that  
569 frozen/thawed ram spermatozoa show accelerated capacitation *in vitro* as assessed by  
570 chlortetracycline assay. Theriogenology 1996; 46: 131-140.
- 571 [53] Rota A, Pena AI, Linde-Forsberg C, Rodriguez-Martinez H. *In vitro* capacitation of  
572 fresh, chilled and frozen-thawed dog spermatozoa assessed by the chlortetracycline assay  
573 and changes in motility patterns. Anim Reprod Sci 1999; 57: 199-215.
- 574

575 **FIGURE LEGENDS**

576 Graph N° 1 - Variation of seminal vigor (according to Howard, et al. 1990) [16] after  
577 cooling and timing<sup>1</sup>. Mean ± SEM \* P <0.05

578 <sup>1</sup>The graphed evaluations correspond to 1 minute after adding the semen activator.

579

580 Graph. N° 2 - Motility with and without the effect of seminal activator during the 14 d  
581 of the evaluation of refrigerated semen<sup>1</sup>. Mean ± SEM \* P <0.05

582 <sup>1</sup>The graphed evaluations correspond to 1 minute after adding the semen activator.

583

584 Graph. N° 3 - Percent variation of vigor and seminal motility average of 14 days, after  
585 the placement of the semen activator (Mean ± SEM)\*

586 \* The variation was calculated as the difference between each value (motility and vigor) of each day  
587 with the course of the evaluation time (1, 5, 10 and 15 minutes).

588

589 Graph N°. 4 -Temporal variation of sperm morphology by vital staining (Mean ± SEM).

590 \* Difference between abnormalities of head or middle piece and significant tail (P <0.05).

591

592 Graph N° 5 - Temporal results of refrigerated semen Host-s samples<sup>1</sup>.

593 <sup>1</sup>Those termed ABNORMAL were those that did not undergo morphological changes after Host-s.

594

595

596

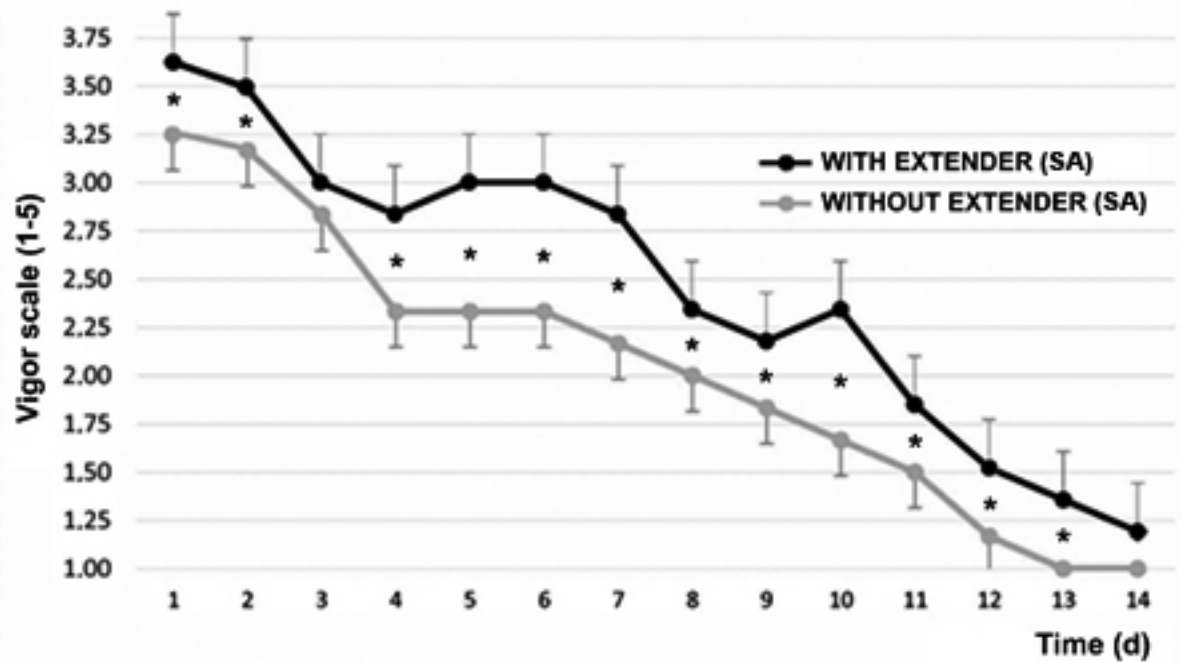

Graph N° 1 - Variation of semina

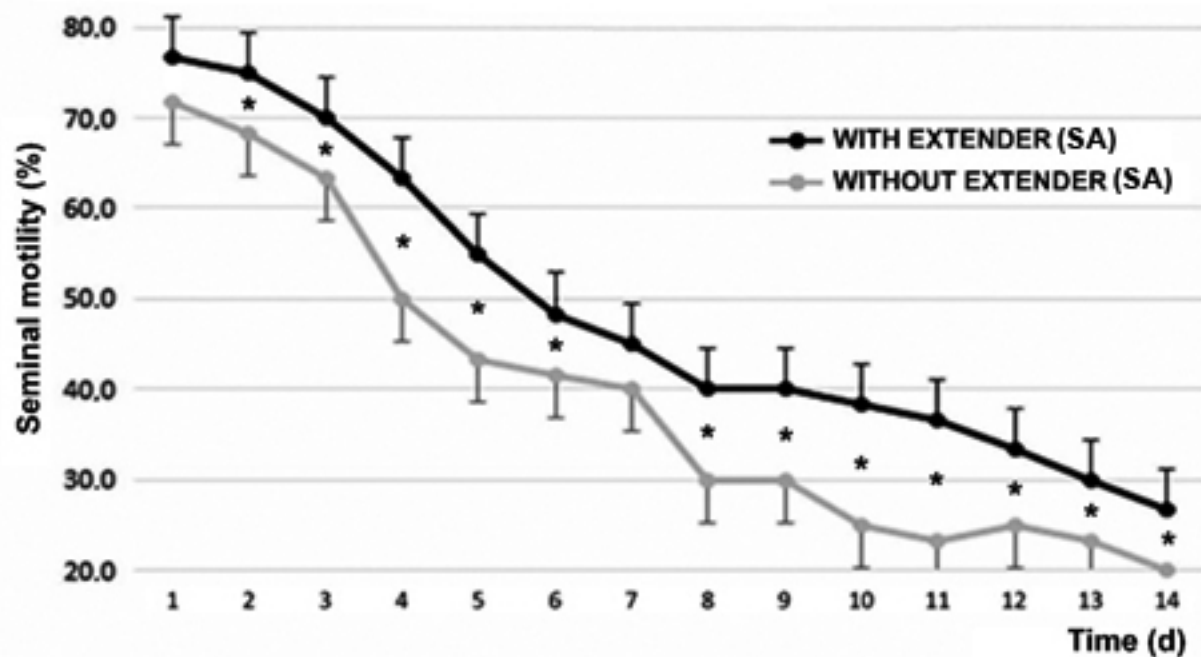

Graph N° 2 - Motility with and wit

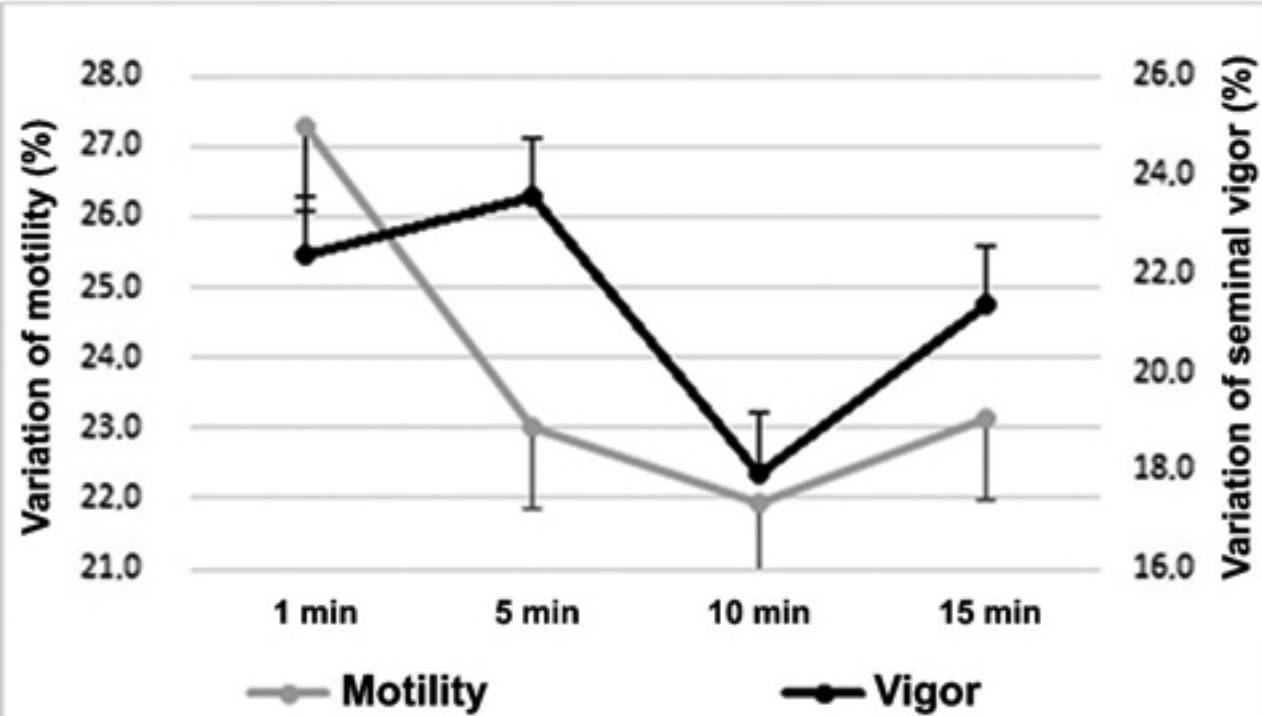

Graph N° 3 - Percent variation of v

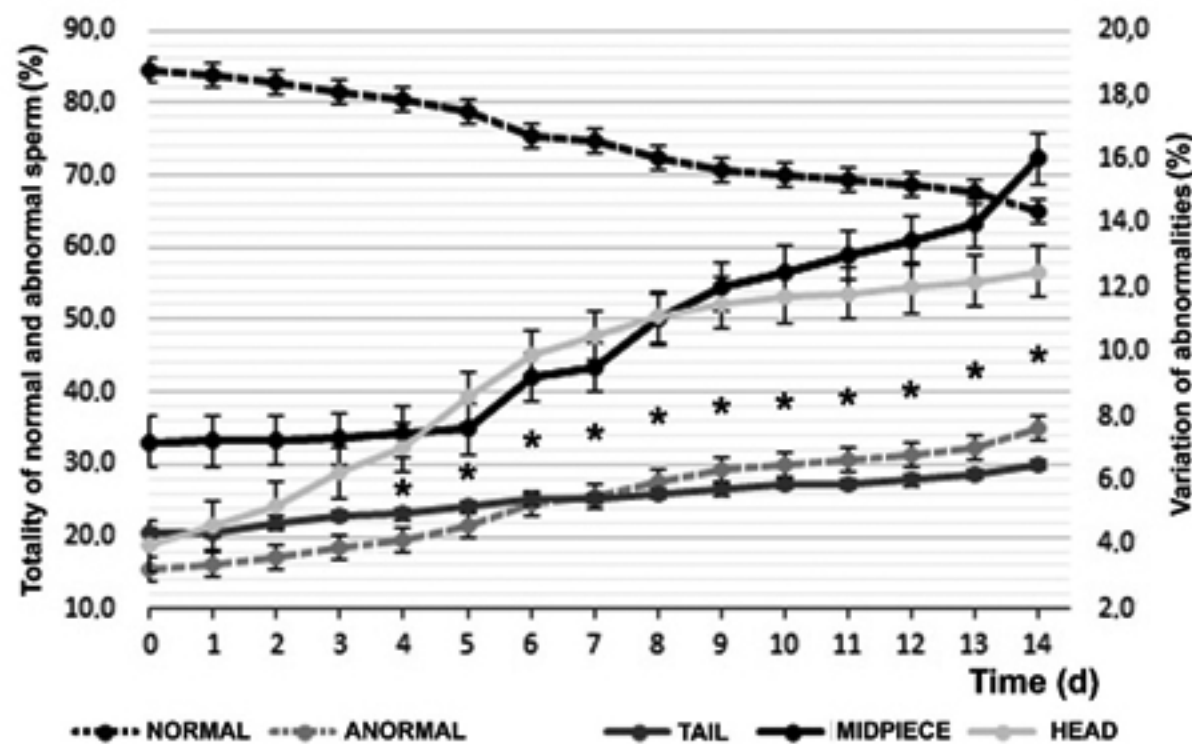

Graph N° 4 - Temporal variation o

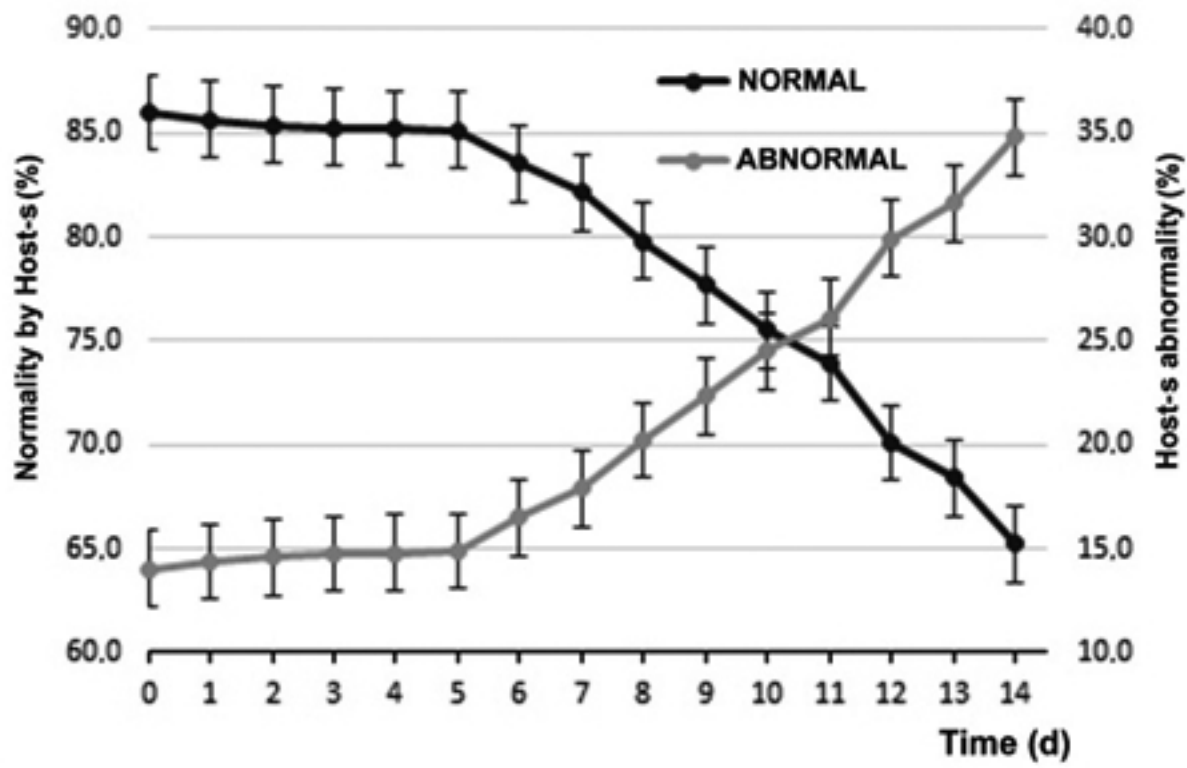

Graph N° 5 - Temporal results of
